# Supplementary material for: Tungsten-doped Ni–Co phosphides with multiple catalytic sites as efficient electrocatalysts for overall water splitting
Source: Royal Society of Chemistry journal article supplement (doi:10.1039/c9ta03944a), 2019-01-01
Supplement: c9ta03944a1.pdf [file c9ta03944a1.pdf]

## Supplementary Information

# **Tungsten-doped Ni-Co phosphides with catalytic multi-sites as efficient electrocatalyst for overall water splitting**

Shan-Shan Lu <sup>a</sup>, Li-Ming Zhang <sup>a</sup>, Yi-Wen Dong <sup>a,b</sup>, Jia-Qi Zhang <sup>a</sup>, Xin-Tong Yan <sup>a,b</sup>,

De-Fan Sun <sup>a,b</sup>, Xiao Shang <sup>a,b</sup>, Jing-Qi Chi <sup>a</sup>, Yong-Ming Chai <sup>a</sup>, Bin Dong <sup>\*a,b</sup>

*a State Key Laboratory of Heavy Oil Processing, Institute of New Energy, China University of Petroleum (East China), Qingdao 266580, PR China*

*b College of Science, China University of Petroleum (East China), Qingdao 266580, PR China*

\* Corresponding author. Email: [dongbin@upc.edu.cn](mailto:dongbin@upc.edu.cn) (B. Dong)

Tel: +86-532-86981156, Fax: +86-532-86981156

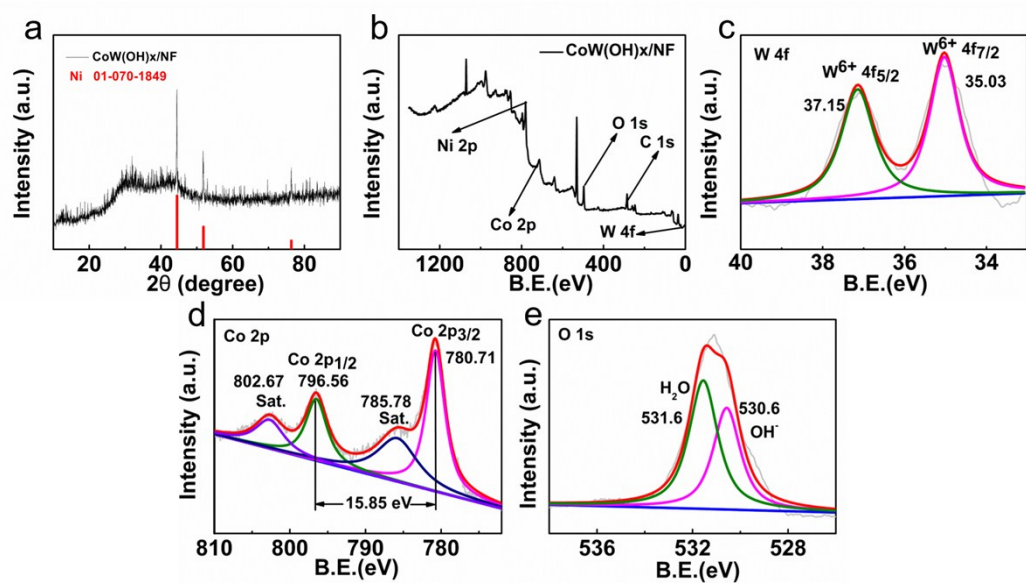

**Fig. S1** (a) XRD pattern of  $\text{CoW(OH)}_x/\text{NF}$ , (b) Survey XPS spectrum and (c–e) high-resolution XPS scans of  $\text{CoW(OH)}_x/\text{NF}$  in the (c) W 4f, (d) Co 2p, and (e) O 1s regions.

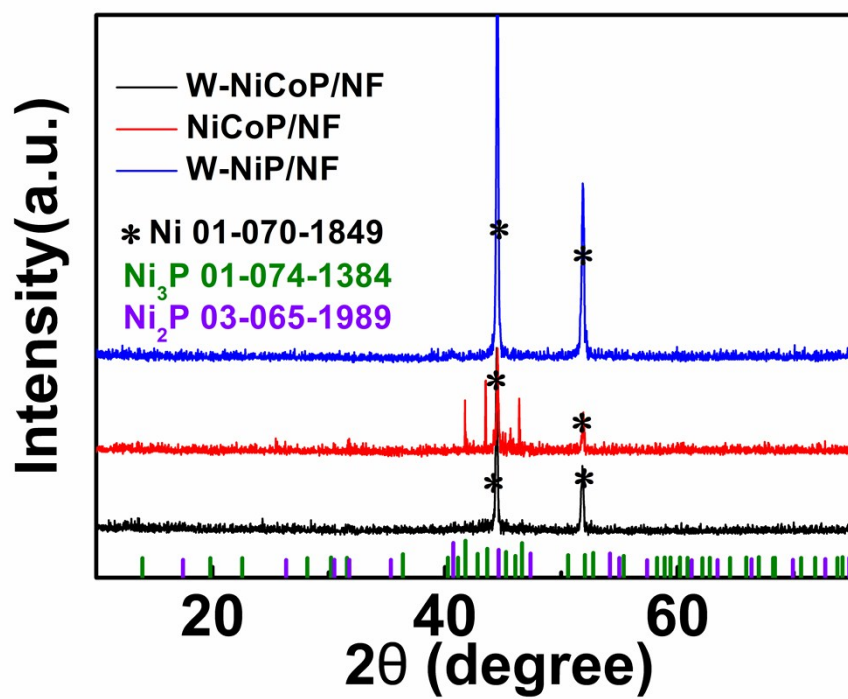

**Fig. S2** XRD patterns of W-NiCoP/NF, NiCoP/NF, and W-NiP/NF after scratching off the samples from NF.

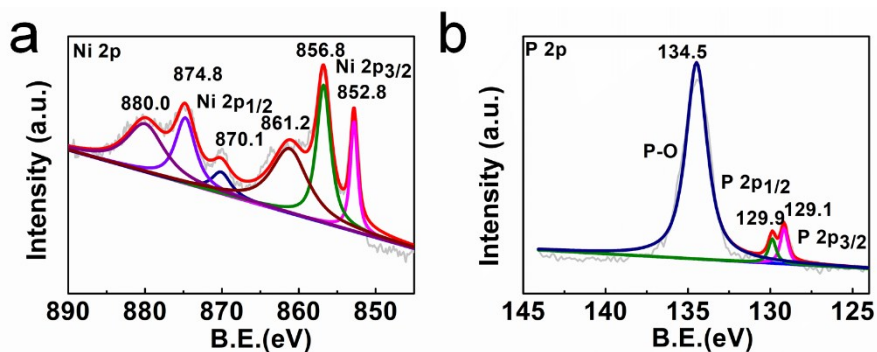

**Fig. S3** XPS spectra of NiP/NF. (a) Ni 2p and (b) P 2p.

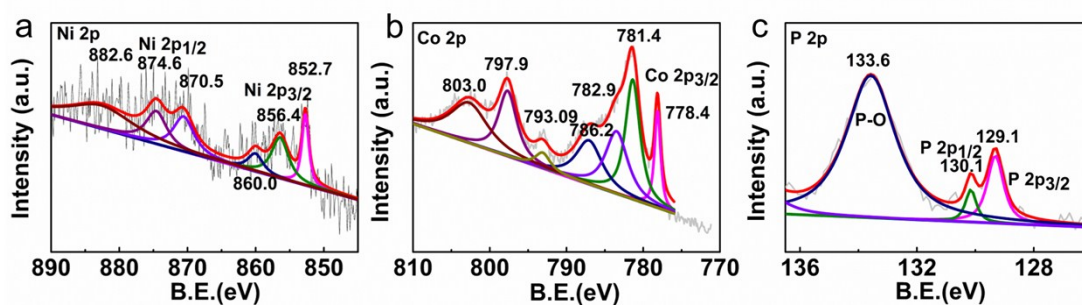

**Fig. S4** XPS spectra of NiCoP/NF. (a) Ni 2p, (b) Co 2p, and (c) P 2p.

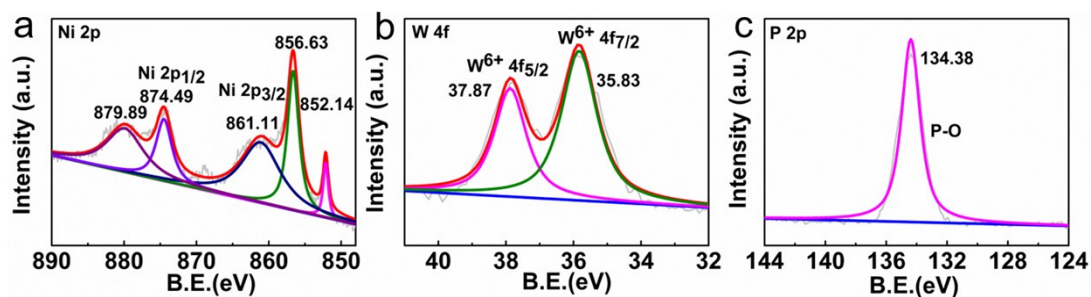

**Fig. S5** XPS spectra of W-NiP/NF. (a) Ni 2p, (b) W 4f, and (c) P 2p.

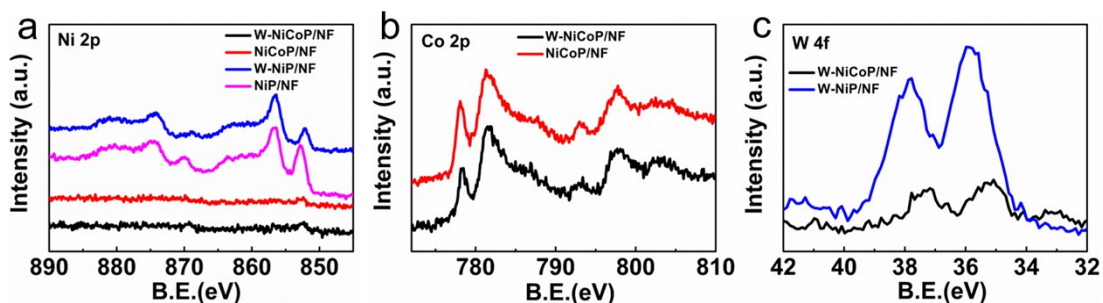

**Fig. S6** (a) XPS spectra of W-NiCoP/NF, NiCoP/NF, W-NiP/NF, and NiP/NF in Ni 2p, (b) XPS spectra of W-NiCoP/NF and NiCoP/NF in Co 2p, (c) XPS spectra of W-NiCoP/NF and W-NiP/NF in W 4f.

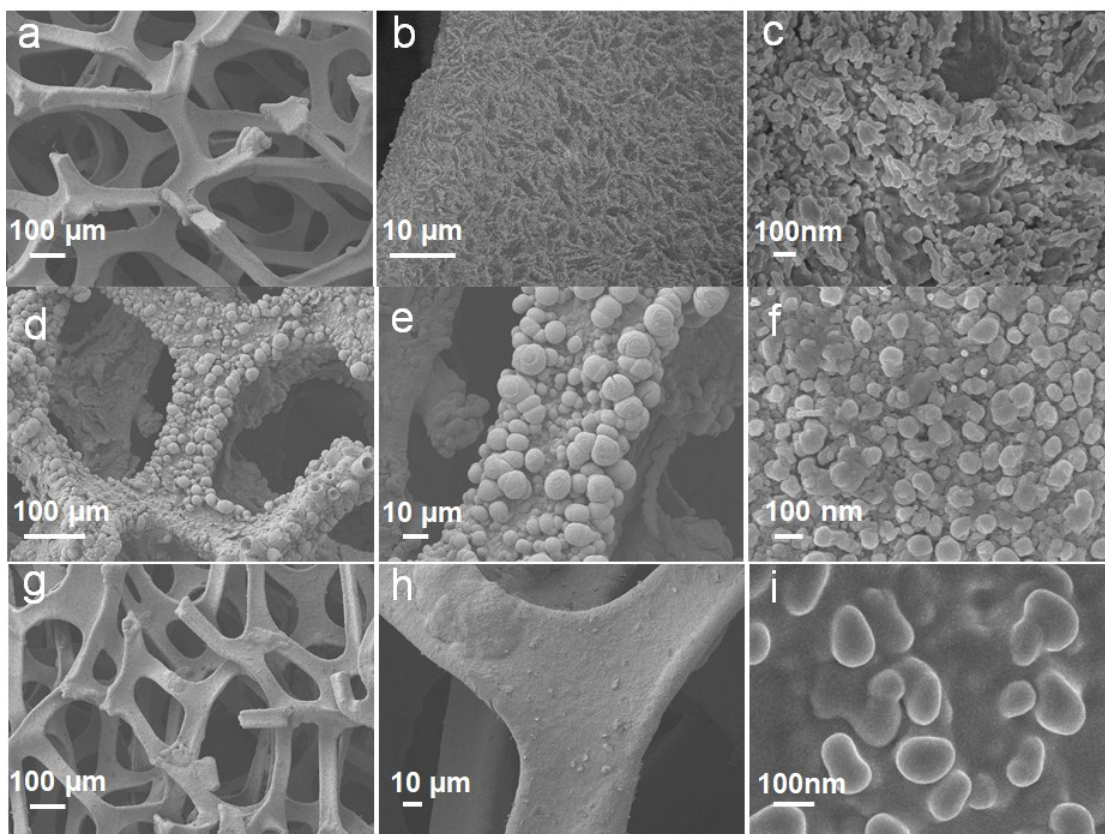

**Fig. S7** SEM images of (a-c) NiP/NF, (d-f) NiCoP/NF, and (g-i) W-NiP/NF.

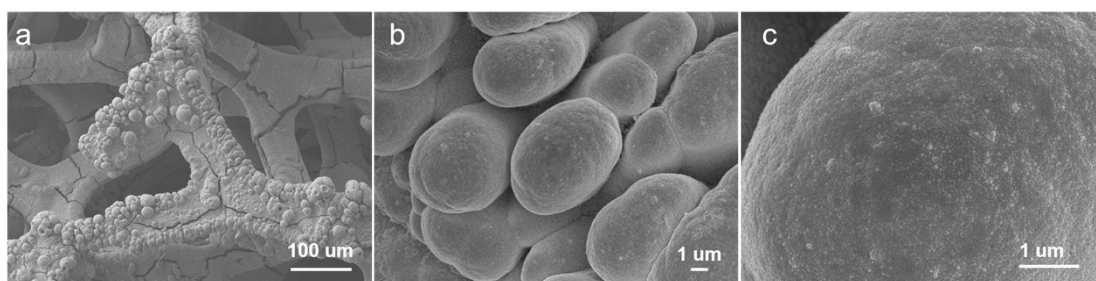

**Fig. S8** (a, b, c) SEM images of CoW(OH)<sub>x</sub>/NF.

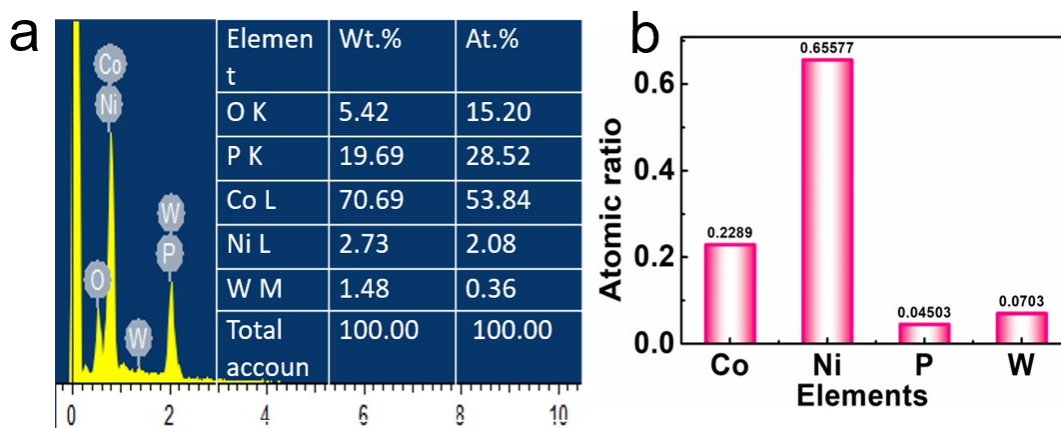

**Fig. S9** (a) Elemental contents, (b) AES-ICP of W-NiCoP/NF.

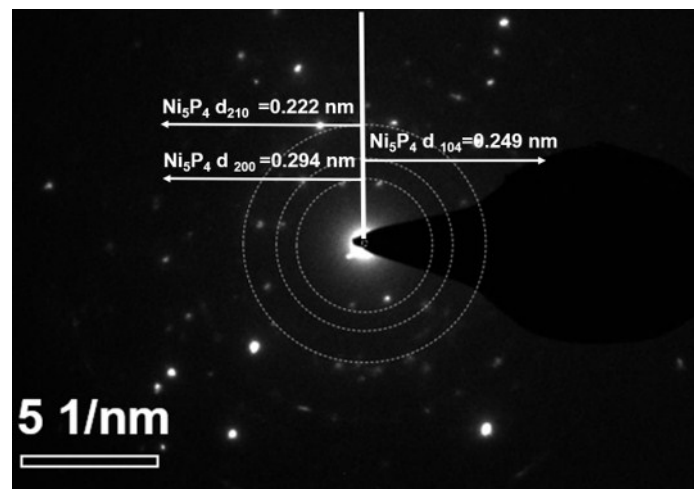

**Fig. S10** SAED of W-NiCoP/NF.

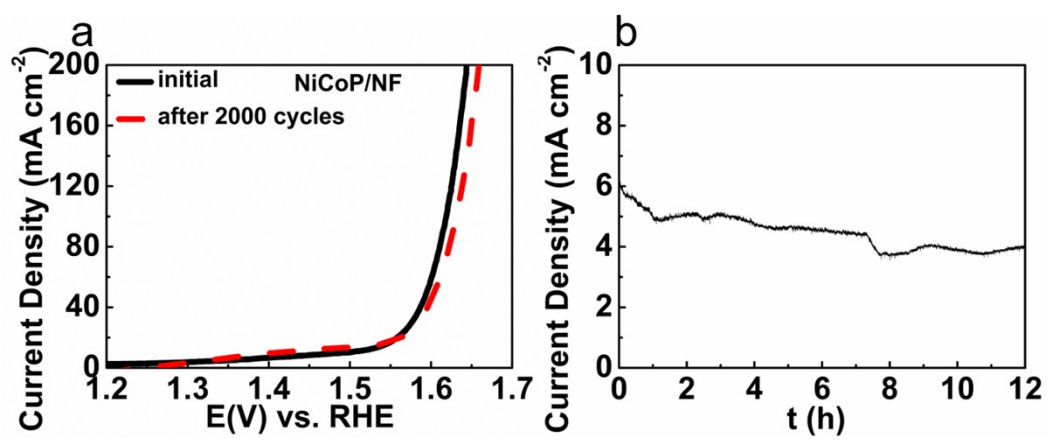

**Fig. S11** (a) Stability tests for NiCoP/NF by 2000 cyclic voltammetry cycles in 1.0 M KOH, (b) Stability tests for NiCoP/NF through chronoamperometry for 12 h in 1.0 M.

KOH.

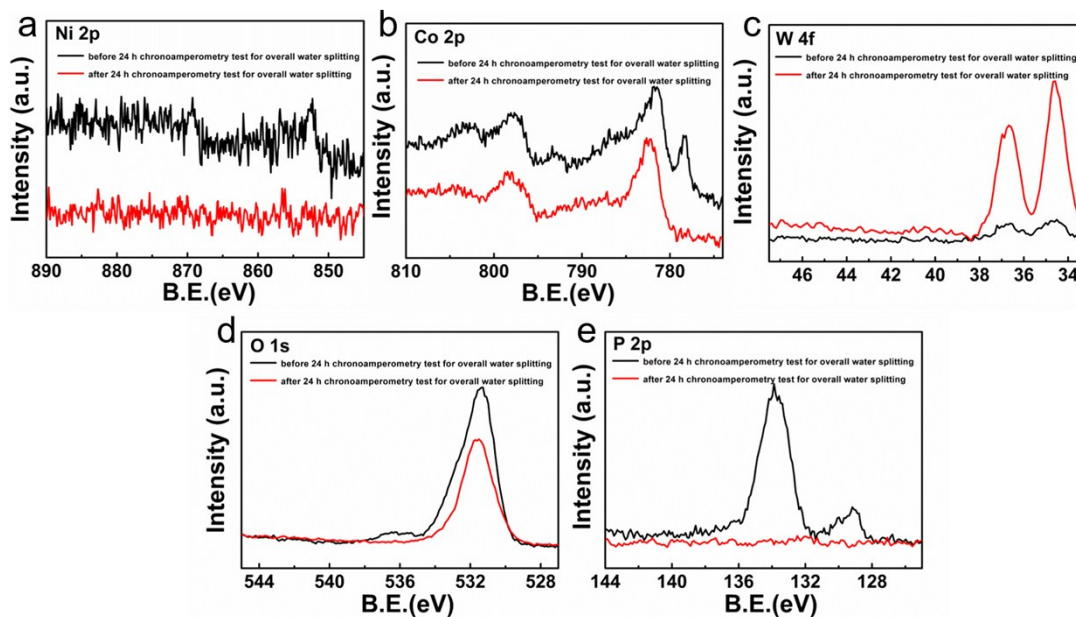

**Fig. S12** High-resolution XPS scans of W-NiCoP/NF as counter electrode in the (a) Ni 2p, (b) Co 2p, (c) W 1f, (d) O 1s, and (e) P 2p regions before and after 24 h chronoamperometry test for overall water splitting in 1.0 M KOH.

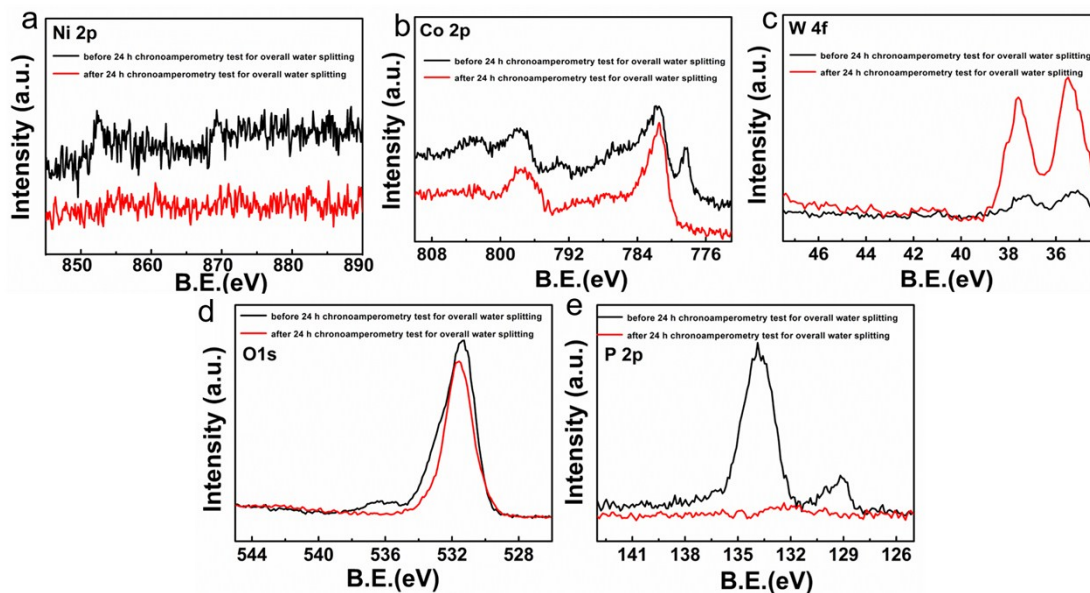

**Fig. S13** High-resolution XPS scans of W-NiCoP/NF as working electrode in the (a) Ni 2p, (b) Co 2p, (c) W 1f, (d) O 1s, and (e) P 2p regions before and after 24 h chronoamperometry test for overall water splitting in 1.0 M KOH.



**Table S1.** Element contents (atom %) of the CoW(OH)<sub>x</sub>/NF.

| Element | Atom % |
|---------|--------|
| Ni      | 8.35   |
| Co      | 15.42  |
| W       | 2.69   |
| O       | 73.55  |

**Table S2.** Comparison of the HER performance of W-NiCoP/NF with other recently reported HER electrocatalysts in alkaline media.

| Electrocatalyst                    | j<br>(mA cm <sup>-2</sup> ) | $\eta$<br>(mV) | Ref.                                                |
|------------------------------------|-----------------------------|----------------|-----------------------------------------------------|
| W-NiCoP/NF                         | 10                          | 29.6           | This work                                           |
| Ni-Co-P HNBS                       | 10                          | 107            | Energy Environ. Sci.,<br>2018, 11, 87               |
| CoNiP@NF                           | 10                          | 155            | J. Mater. Chem. A, 2016, 4, 10195                   |
| CoO <sub>x</sub> @CN               | 10                          | 232            | <i>J. Am. Chem. Soc.</i><br><b>2015</b> , 137, 2688 |
| Ni/Ni <sub>3</sub> N foam          | 10                          | ~399           | J. Mater. Chem. A, 2015, 3, 8171                    |
| CoP/rGO-T                          | 10                          | 150            | Chem. Sci., 2016, 7, 1690                           |
| CoP NA/Ti                          | 10                          | 90             | Chem. Mater., 2014, 26, 4326                        |
| CoP <sub>2</sub> /RGO              | 10                          | 88             | J. Mater. Chem. A, 2016, 4, 4686                    |
| Mn-Co-P/Ti                         | 10                          | 76             | ACS Catal., 2016, 7, 98                             |
| Ni <sub>3</sub> FeN-NPs            | 10                          | 158            | Adv. Energy Mater., 2016, 6, 1502585.               |
| Co <sub>9</sub> S <sub>8</sub> /CC | –                           | 175            | J. Mater. Chem. A, 2016, 4, 6860                    |

**Table S3.** Elemental values of simulated equivalent circuit for NiP/NF, W-NiP/NF, NiCoP/NF, and W-NiCoP/NF in alkaline solution.

| Samples    | $R_s/\Omega$ | $R_{ct}/\Omega$ |
|------------|--------------|-----------------|
| W-NiCoP/NF | 1.053        | 2.216           |
| NiCoP/NF   | 1.969        | 90.1            |
| W-NiP/NF   | 1.198        | 9.166           |
| NiP/NF     | 1.869        | 70.35           |

**Table S4.** Comparison of the OER performance of W-NiCoP/NF with other recently reported electrocatalysts in alkaline media.

| Electrocatalyst                                            | j<br>(mA cm <sup>-2</sup> ) | $\eta$<br>(mV) | Ref.                                                |
|------------------------------------------------------------|-----------------------------|----------------|-----------------------------------------------------|
| W-NiCoP/NF                                                 | 20                          | 200            | This work                                           |
| Ni-Co-P HNBS                                               | 10                          | 270            | <i>Energy Environ.Sci.</i> ,<br>2018, 11, 872       |
| NiCoP nanoparticle                                         | 10                          | 310            | <i>Adv. Mater. Interfaces</i> 2016,<br>3,1500454    |
| FeP                                                        | 10                          | 288            | <i>Chem. Eur. J.</i> 2015, 21, 18062                |
| Co4N/CC                                                    | 10                          | 257            | <i>Angew. Chem. Int. Ed.</i><br>2015, 54, 14710     |
| np-(Co <sub>0.52</sub> Fe <sub>0.48</sub> ) <sub>2</sub> P | 10                          | 270            | <i>Energy Environ. Sci.</i><br>2016, 9, 2257        |
| Cu <sub>0.3</sub> Co <sub>2.7</sub> P/NC                   | 10                          | 190            | <i>Adv. Energy. Mater.</i> 2017, 7, 1601555         |
| W <sub>0.5</sub> Co <sub>0.4</sub> Fe <sub>0.1</sub> /NF   | 10                          | 310            | <i>Angew. Chem. Int. Ed.</i><br>2017, 56, 4502-4506 |
| N-doped carbon                                             | 10                          | 158            | <i>Nat. Commun.</i> 2017, 8, 13592                  |
| NiFe-NS                                                    | 10                          | 302            | <i>Nat. Commun.</i> 2014, 5, 4477                   |
| Ni <sub>0.9</sub> Fe <sub>0.1</sub> /NC                    | 10                          | 330            | <i>ACS Catal.</i> 2016, 6, 580-588                  |

**Table S5.** Comparison of the overall water splitting performance of W-NiCoP/NF with other recently reported electrocatalysts in alkaline media.

| Electrocatalyst      | j<br>(mA cm <sup>-2</sup> ) | $\eta$<br>(mV) | Ref.                                           |
|----------------------|-----------------------------|----------------|------------------------------------------------|
| W-NiCoP/NF           | 20                          | 1.54           | This work                                      |
| Ni5P4/ Ni5P4         | 10                          | 1.7            | <i>Angew.Chem.Int.Ed.</i><br>2015,54,12361     |
| CP@Ni-P/CP@Ni-P      | 10                          | 1.63           | <i>Adv.Funct.Mater.</i> 2016,26,4067           |
| CoP-Cu/CoP-Cu        | 10                          | 1.645          | <i>Angew.Chem. .Int.Ed.</i><br>2015,127,6349.  |
| Ni2P-NF/Ni2P-NF      | 10                          | 1.63           | <i>Energy Environ. Sci.</i><br>2015,8,1027.    |
| Ni12P5-NF/ Ni12P5-NF | 10                          | 1.64           | <i>ACS Catal.</i> 2015,7.103                   |
| CoSe2-CC/CoSe2-CC    | 10                          | 1.63           | <i>Adv. Mater.</i> 2016,28,7527.               |
| NiCo2O4              | 10                          | 1.65           | <i>Angew. Chem. Int. Ed.</i><br>2016, 55, 6290 |
| Ni2P                 | 10                          | 1.63           | <i>Energy Environ. Sci.</i><br>2015, 8, 2347   |
| CoSe film            | 10                          | 1.65           | <i>Chem. Commun.</i> 2015, 51, 16683           |
| NiFeOx               | 10                          | 1.51           | <i>Nat. Commun.</i> 2015, 6, 7261              |

**Table S6** Element contents (atom %) of the W-NiCoP/NF before and after overall water splitting

| Samples        | Ni   | Co    | W    | P     | O     |
|----------------|------|-------|------|-------|-------|
| W-NiCoP/NF     | 2.68 | 8.23  | 0.28 | 21.96 | 66.84 |
| W-NiCoP/NF-HER | 3.31 | 11.68 | 3.55 | 6.47  | 74.99 |
| W-NiCoP/NF-OER | 3.01 | 11.26 | 2.84 | 5.13  | 77.75 |
